# Supplementary material for: Biphenyl tetracarboxylic acid-based metal–organic frameworks: a case of topology-dependent thermal expansion
Source: Royal Society of Chemistry journal article supplement (doi:10.1039/d3mh02185h), 2024-01-01
Supplement: d3mh02185h1.pdf [file d3mh02185h1.pdf]

## Supporting information

### **Biphenyl Tetracarboxylic Acid based Metal-Organic Frameworks: A Case of Topology-Dependent Thermal Expansion**

Zhanning Liu,<sup>a,b\*</sup> Chengyong Xing,<sup>a</sup> Shaowen Wu,<sup>a</sup> Min Ma,<sup>a</sup> and Jian Tian<sup>a</sup>

- School of Materials Science and Engineering, Shandong University of Science and Technology, Qingdao, 266590, China.
- State Key Laboratory of Structural Chemistry, Fujian Institute of Research on the Structure of Matter, Chinese Academy of Sciences, Fuzhou, Fujian 350002, China.

#### **Materials and Synthesis**

All reagents and solvents were used as received from commercial supplier without further purification.

#### **Synthesis of InOF-1**

156 mg of  $\text{In}(\text{NO}_3)_3 \cdot 5\text{H}_2\text{O}$  and 33 mg of H4BPTC ligand were dissolved in a 5 mL solution of N,N-dimethylformamide and acetonitrile (1:1). To this solution, 0.2 mL of nitric acid was added. After stirring at room temperature for 30 minutes, the solution was transferred to a Teflon-lined autoclave and heated for 3 days at 85°C. The resulting product was filtered, washed multiple times with ethanol, and then dried under ambient air.

#### **Synthesis of InOF-2**

22 mg of  $\text{InCl}_3 \cdot 4\text{H}_2\text{O}$  and 33 mg of H4BPTC ligand were dissolved in a 5 mL solution of N,N-diethylformamide and acetonitrile (1:1). To this solution, 0.2 mL of nitric acid was added. After stirring at room temperature for 30 minutes, the solution was transferred to a Teflon-lined autoclave and heated for 10 days at 85°C. The resulting product was filtered, washed multiple times with ethanol, and then dried under ambient air.

#### **Synthesis of InOF-12**

33 mg of  $\text{InCl}_3$  and 33 mg of H4BPTC ligand were dissolved in a 6 mL solution of N,N-dimethylacetamide and ethanol (1:1). To this solution, 0.1 mL of nitric acid was added. After stirring at room temperature for 30 minutes, the solution was transferred to a Teflon-lined autoclave and heated for 5 days at 85°C. The resulting product was filtered, washed multiple times with ethanol, and then dried under ambient air.

#### **Synthesis of InOF-13**

A mixture of 33 mg of  $\text{InCl}_3$ , 33 mg of H4BPTC ligand and 11 mg of dabco (1,4-Diazabicyclo[2.2.2]octane) was dissolved in a 5 mL solution of N,N-diethylformamide. To this solution, 0.1 mL of nitric acid was added. After stirring at room temperature for 30 minutes, the solution was transferred to a Teflon-lined autoclave and heated for 5 days at 85°C. The resulting product was filtered, washed multiple times with ethanol, and then dried under ambient air.

## Characterization

Before measurements, all samples were dried under vacuum at 60°C for 3h to eliminate the influence of adsorbed water molecules. The in situ variable temperature powder X-ray diffraction data were collected on a laboratory diffractometer (PANalytical X'PertPro) with Cu-K $\alpha$  radiation. The scan was carried out using the TTK-450 non-ambient stage from 123K to 473K with an interval of 25 or 50K.

Variable temperature high-resolution synchrotron based X-ray diffraction data were collected using the 11-BM-B beamline (Advanced Photon Source, Argonne National Laboratory). The wavelength was calibrated to  $\lambda = 0.4589340 \text{ \AA}$  using a CeO<sub>2</sub> standard. The sample was loaded into a 0.8mm diameter Kapton capillary, which was then spun at several radians per second to improve particle statistics. The temperature was controlled from 100 to 400K (in intervals of 25K) using an Oxford Cryostream 700+ N<sub>2</sub> gas blower.

Lebail fitting and Rietveld refinements of the diffraction data were performed using the GSAS and EXPGui software.<sup>1</sup>

Single crystal X-ray diffraction (SCXRD) data were collected using an Oxford SuperNova diffractometer with microsource Cu-K $\alpha$  radiation ( $\lambda = 1.54184 \text{ \AA}$ ) and equipped with a 800 Cryostream low-temperature unit (Oxford, Cryosystems, Oxford, U.K.). All diffraction data of InOF-1 was collected continuously at 110K, 150K, 200K, 250K, 300K and 350K with a heating rate of 5K/min. The single crystal specimen was mounted on a glass fibre. The measurement temperatures were controlled by an open-flow dry N<sub>2</sub> cryostat. Before data collection, the specimen was hold at target temperature for 10 min. The structure was solved by the direct method and refined with a full-matrix least-squares technique using Olex2.<sup>2</sup> The hydrogen atoms were generated geometrically and refined using a riding model. The twin law  $[-1, 0, 0, 0, -1, 0, 0, 0, -1, 2]$  was identified by the "TwinRotMat" program. The percentage of twin is given by a batch scale factor (BASF) of 0.42.

Raman measurements were performed with a multichannel modular triple Raman systems (JY-HR800) with confocal microscopy. The solid-state diode laser (532 nm) from Coherent Company-Verdi-2 was used as an excited source.

DFT calculations were performed using the CASTEP program.<sup>3</sup> Prior to the vibrational calculations, the crystal structure was fully optimized. Vibrational properties were calculated using the linear response formalism, where the phonon frequencies were obtained by the second derivative of the total energy with respect to the given perturbation.

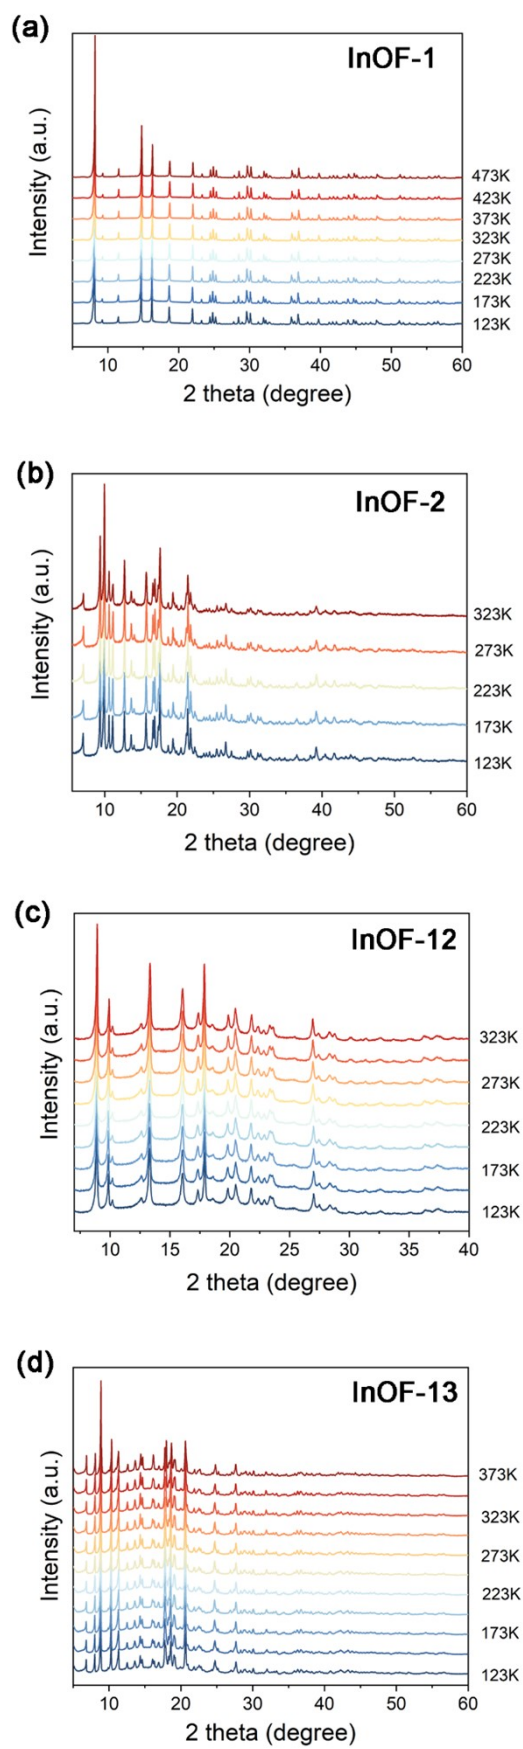

**Figure S1** Laboratory VT-PXRD patterns of InOF-1(a), InOF-2 (b), InOF-12 (c) and InOF-13 (d).

**Table S1** Unit cell volumes of InOF-1, InOF-2, InOF-12 and InOF-13 extracted by the Le Bail fitting based on the VT-PXRD results.

|      | $V_{\text{InOF-1}} (\text{\AA}^3)$ | $V_{\text{InOF-2}} (\text{\AA}^3)$ | $V_{\text{InOF-12}} (\text{\AA}^3)$ | $V_{\text{InOF-13}} (\text{\AA}^3)$ |
|------|------------------------------------|------------------------------------|-------------------------------------|-------------------------------------|
| 123K | 2964.979                           | 3552.121                           | 1746.210                            | 3336.808                            |
| 148  | -                                  | -                                  | 1747.724                            | 3338.094                            |
| 173  | 2964.114                           | 3552.655                           | 1749.847                            | 3347.006                            |
| 198  | -                                  | -                                  | 1751.389                            | 3354.92                             |
| 223  | 2962.470                           | 3555.701                           | 1752.285                            | 3355.495                            |
| 248  | -                                  | -                                  | 1753.789                            | 3358.51                             |
| 273  | 2961.735                           | 3562.027                           | 1757.267                            | 3360.801                            |
| 298  | -                                  | -                                  | 1760.056                            | 3364.087                            |
| 323  | 2960.075                           | 3566.216                           | 1760.500                            | 3369.436                            |
| 348  | -                                  | -                                  | -                                   | 3374.624                            |
| 373  | 2958.585                           | -                                  | -                                   | 3379.576                            |
| 398  | -                                  | -                                  | -                                   | -                                   |
| 423  | 2958.065                           | -                                  | -                                   | -                                   |
| 448  | -                                  | -                                  | -                                   | -                                   |
| 473  | 2957.811                           | -                                  | -                                   | -                                   |

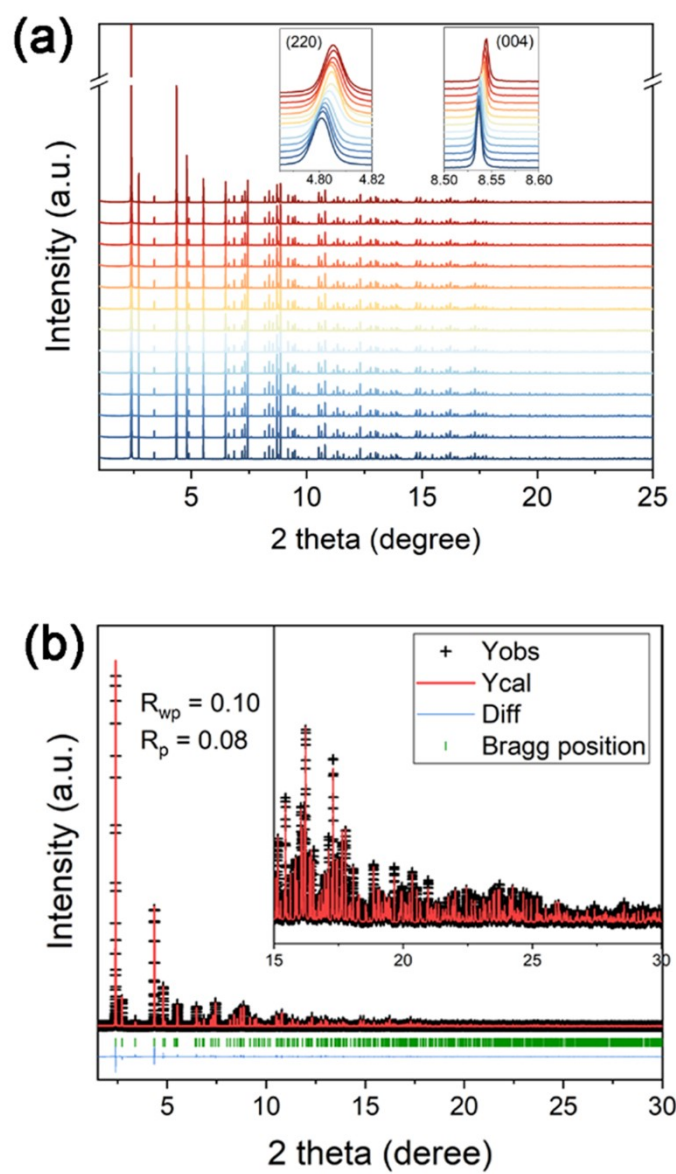

**Figure S2** (a) Synchrotron based VT-XRD patterns of InOF-1, (b) Rietveld refinement pattern of InOF-1 that measured at 100K ( $R_{wp} = 0.10$ ,  $R_p = 0.08$ ).

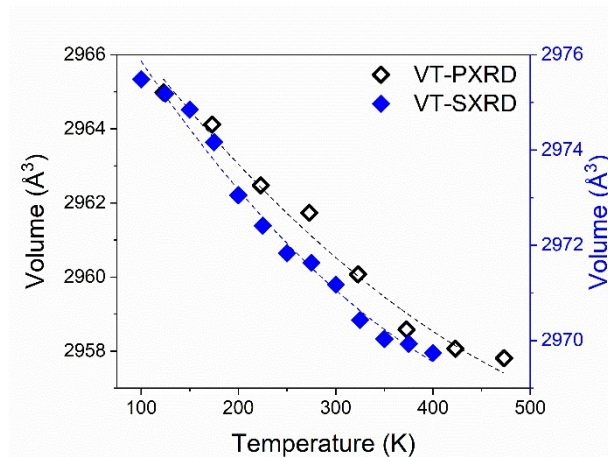

**Figure S3** Temperature dependent unit cell volume changes of InOF-1 that obtained based on the VT-PXRD data (black empty diamonds) and VT-SXRD data (blue filled diamonds)

**Table S2** Lattice parameters of InOF-1 that obtained based on the VT-SXRD data.

| Temperature (K) | $a(b)$ (Å) | $c$ (Å)  | $V$ (Å <sup>3</sup> ) |
|-----------------|------------|----------|-----------------------|
| 100             | 15.52088   | 12.35165 | 2975.48365            |
| 125             | 15.51997   | 12.35184 | 2975.18225            |
| 150             | 15.51911   | 12.35182 | 2974.84771            |
| 175             | 15.51768   | 12.35128 | 2974.16780            |
| 200             | 15.51558   | 12.34997 | 2973.04909            |
| 225             | 15.51500   | 12.34825 | 2972.41226            |
| 250             | 15.51490   | 12.34600 | 2971.83186            |
| 275             | 15.51487   | 12.34523 | 2971.63502            |
| 300             | 15.51435   | 12.34415 | 2971.17583            |
| 325             | 15.51306   | 12.34313 | 2970.43465            |
| 350             | 15.51257   | 12.34224 | 2970.03379            |
| 375             | 15.51272   | 12.34156 | 2969.93105            |
| 400             | 15.51315   | 12.34008 | 2969.73774            |

**Table S3** Crystallographic data of compound InOF-1 at different temperatures.

|                   | InOF-1-110 K                                    | InOF-1-150 K                                    | InOF-1-200 K                                    |
|-------------------|-------------------------------------------------|-------------------------------------------------|-------------------------------------------------|
| Empirical formula | C <sub>8</sub> H <sub>3</sub> O <sub>5</sub> In | C <sub>8</sub> H <sub>3</sub> O <sub>5</sub> In | C <sub>8</sub> H <sub>3</sub> O <sub>5</sub> In |
| Formula weight    | 293.92                                          | 293.92                                          | 293.92                                          |

|                                            |                                           |                                           |                                           |
|--------------------------------------------|-------------------------------------------|-------------------------------------------|-------------------------------------------|
| Temperature/K                              | 110                                       | 150                                       | 200                                       |
| Crystal system                             | Tetragonal                                | Tetragonal                                | Tetragonal                                |
| Space group                                | $I4_122$                                  | $I4_122$                                  | $I4_122$                                  |
| $a/\text{\AA}$                             | 15.4846                                   | 15.4819                                   | 15.4791                                   |
| $b/\text{\AA}$                             | 15.4846                                   | 15.4819                                   | 15.4791                                   |
| $c/\text{\AA}$                             | 12.3372                                   | 12.3361                                   | 12.3348                                   |
| $\alpha/^\circ$                            | 90.00                                     | 90.00                                     | 90.00                                     |
| $\beta/^\circ$                             | 90.00                                     | 90.00                                     | 90.00                                     |
| $\gamma/^\circ$                            | 90.00                                     | 90.00                                     | 90.00                                     |
| Volume/ $\text{\AA}^3$                     | 2958.13                                   | 2956.83                                   | 2955.45                                   |
| Z                                          | 8                                         | 8                                         | 8                                         |
| $\rho_{\text{calc}}/\text{cm}^3$           | 1.32                                      | 1.32                                      | 1.32                                      |
| $\mu/\text{mm}^{-1}$                       | 12.776                                    | 12.782                                    | 12.778                                    |
| F(000)                                     | 1120                                      | 1120                                      | 1120                                      |
| Goodness-of-fit on $F^2$                   | 1.156                                     | 1.201                                     | 1.173                                     |
| Final R indexes [ $I \geq 2\sigma$<br>(I)] | R1 = 0.0243, wR2 =<br>0.0661              | R1 = 0.0216, wR2 =<br>0.0642              | R1 = 0.0220, wR2<br>= 0.0666              |
| Final R indexes [all<br>data]              | R1 = 0.0249, wR2 =<br>0.0668,             | R1 = 0.0223, wR2 =<br>0.0645              | R1 = 0.0228, wR2<br>= 0.0670              |
| CCDC number                                | 2336419                                   | 2336420                                   | 2336421                                   |
|                                            | InOF-1-250 K                              | InOF-1-300 K                              | InOF-1-350 K                              |
| Empirical formula                          | $\text{C}_8\text{H}_3\text{O}_5\text{In}$ | $\text{C}_8\text{H}_3\text{O}_5\text{In}$ | $\text{C}_8\text{H}_3\text{O}_5\text{In}$ |
| Formula weight                             | 293.92                                    | 293.92                                    | 293.92                                    |
| Temperature/K                              | 250                                       | 300                                       | 350                                       |
| Crystal system                             | Tetragonal                                | Tetragonal                                | Tetragonal                                |
| Space group                                | $I4_122$                                  | $I4_122$                                  | $I4_122$                                  |
| $a/\text{\AA}$                             | 15.4763                                   | 15.4732                                   | 15.4711                                   |
| $b/\text{\AA}$                             | 15.4763                                   | 15.4732                                   | 15.4711                                   |
| $c/\text{\AA}$                             | 12.3336                                   | 12.3324                                   | 12.3310                                   |
| $\alpha/^\circ$                            | 90.00                                     | 90.00                                     | 90.00                                     |
| $\beta/^\circ$                             | 90.00                                     | 90.00                                     | 90.00                                     |
| $\gamma/^\circ$                            | 90.00                                     | 90.00                                     | 90.00                                     |
| Volume/ $\text{\AA}^3$                     | 2954.09                                   | 2952.65                                   | 2951.49                                   |
| Z                                          | 8                                         | 8                                         | 8                                         |
| $\rho_{\text{calc}}/\text{cm}^3$           | 1.322                                     | 1.322                                     | 1.322                                     |
| $\mu/\text{mm}^{-1}$                       | 12.793                                    | 12.800                                    | 12.805                                    |
| F(000)                                     | 1120                                      | 1120                                      | 1120                                      |
| Goodness-of-fit on $F^2$                   | 1.162                                     | 0.905                                     | 1.073                                     |
| Final R indexes [ $I \geq 2\sigma$<br>(I)] | R1 = 0.0269, wR2 =<br>0.0777,             | R1 = 0.0204, wR2 =<br>0.0588              | R1 = 0.0222, wR2<br>= 0.0624              |
| Final R indexes [all<br>data]              | R1 = 0.0275, wR2 =<br>0.0780,             | R1 = 0.0219, wR2 =<br>0.0598              | R1 = 0.0253, wR2<br>= 0.0638              |
| CCDC number                                | 2336422                                   | 2336423                                   | 2336424                                   |

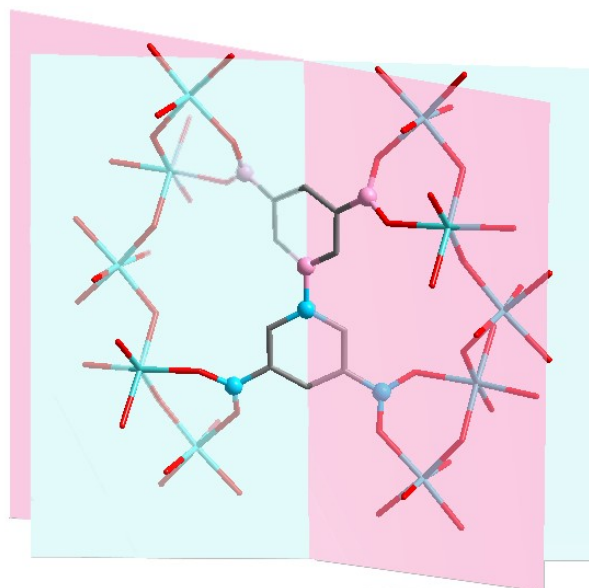

**Figure S4** Definition of the dihedral angle  $\beta$ . Each plane is built based on three carbon atoms (including one carbon atom in the phenyl and two carboxylate C atoms, shown as large balls).

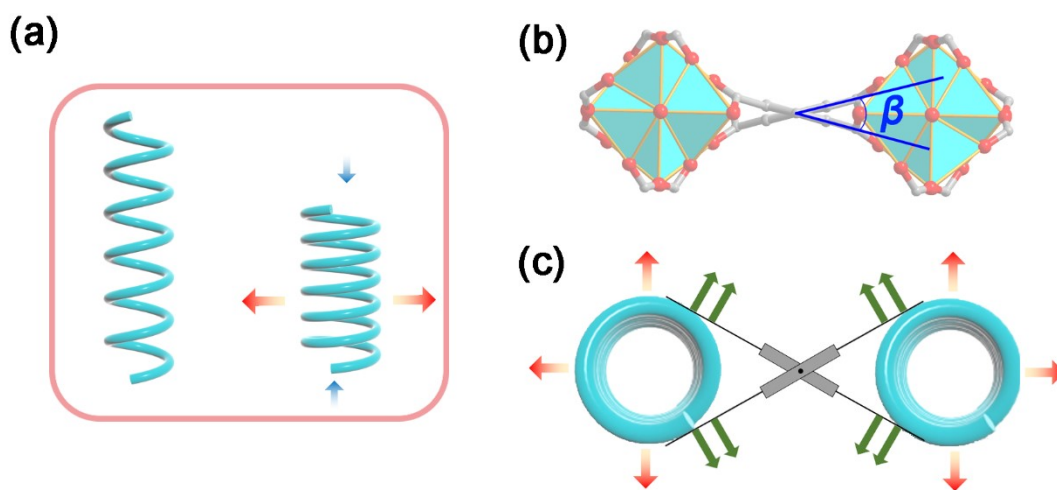

**Figure S5** (a) Spring-like distortion of the 1D helical  $[\text{InO}_6]_\infty$  chain. (b) Crystal structure of InOF-1 viewing along  $c$ -axis. (c) Illustration of the 1D helical  $[\text{InO}_6]_\infty$  chain expansion drove twisting of BPTC ligand.

**Reference:**

- 1 a) A. C. Larson, R. B. Von Dreele, *Report LAUR* 1994, 86; b) B. H. Toby, *J. Appl. Cryst.* 2001, **34**, 210.
- 2 O. V. Dolomanov, L. J. Bourhis, R. J. Gildea, J. A. Howard, H. Puschmann, *J. Appl. Cryst.* 2009, **42**, 339.



3 S. J. Clark, M. D. Segall, C. J. Pickard, P. J. Hasnip, M. I. Probert, K. Refson, M. C. Payne, *Z. Krist.-Cryst Mater.* 2005, **220**, 567.
